**Herbert N. Chado, M.D.**  
Senior Medical Consultant  
Neurotron, Inc.  
Evergreen Medical Consultants  
Evergreen, Colorado

## References

1. Dotson RM: Clinical neurophysiology laboratory tests to assess the nociceptive system in humans. *J Clin Neurophysiol* 1997; 14(1):32-45
2. Katims JJ: Electrodiagnostic functional sensory evaluation of the patient with pain: A review of the neuroselective current perception threshold (CPT) and pain tolerance threshold (PTT). *Pain Digest* 1998; 8:219-30

3. Masson EA, Veves A, Fernando D, Boulton AJM: Current perception thresholds: A new, quick, and reproducible method for the assessment of peripheral neuropathy in diabetes mellitus. *Diabetologia* 1989; 32:724-8
4. McAllister RMR, Urban LA, Dray A, Smith PJ: Comparison of the sensory threshold in healthy human volunteers with the sensory nerve response of the rat *in vitro* hindlimb skin and saphenous nerve preparation on cutaneous electrical stimulation. *J Hand Surg [Br]* 1995; 20(B:4):437-43
5. Liu S, Kopacz KJ, Carpenter RL: Quantitative assessment of differential sensory nerve block after lidocaine spinal anesthesia. *ANESTHESIOLOGY* 1995; 82(1):60-63

(Accepted for publication November 24, 1998.)

Anesthesiology  
1999; 90:1230  
© 1999 American Society of Anesthesiologists, Inc.  
Lippincott Williams & Wilkins, Inc.

*In Reply:*—We appreciate Dr. Chado's comments and interest in our article. We have reanalyzed the data as suggested by Dr. Chado. The ratio of pre- and posttreatment current perception threshold values were not significantly different (table 1). There was a trend for the 250- and 5-Hz lumbar groups to have a greater change posttreatment (as would be predicted), but the variability was too great to demonstrate this difference statistically. It is possible that a larger sample size or a crossover study design would have decreased the variability and demonstrated the predicted differences (we have considered both factors in subsequent studies). Another factor may be that the neurometer is not sensitive enough to measure the mild sensory changes effected by intrathecal opioids.

Finally, we agree with Dr. Chado that there is good evidence that the

neurometer selectively stimulates various nerve fibers. However, to our knowledge, definitive patch clamp experiments have yet to be performed.

**Edward T. Riley, M.D.**  
**Sheila E. Cohen, M.B. Ch.B., F.R.C.A.**  
**Cathy L. Hamilton, M.D.**  
Department of Anesthesia  
Stanford University School of Medicine  
Stanford, California 94305  
edriley@Leland.Stanford.edu

(Accepted for publication November 24, 1998.)

**Table 1. Ratio of Pretreatment and Posttreatment Current Perception Threshold Values**

| Group      | Cervical  |           |           | Lumbar    |           |           |
|------------|-----------|-----------|-----------|-----------|-----------|-----------|
|            | 2,000 Hz  | 250 Hz    | 5 Hz      | 2,000 Hz  | 250 Hz    | 5 Hz      |
| Saline     | 1.1 ± 0.2 | 1.0 ± 0.3 | 0.9 ± 0.5 | 1.0 ± 0.1 | 0.8 ± 0.3 | 0.9 ± 0.7 |
| Sufentanil | 1.1 ± 0.3 | 1.3 ± 0.5 | 1.1 ± 0.2 | 0.9 ± 0.2 | 1.3 ± 0.6 | 1.9 ± 1.7 |

Anesthesiology  
1999; 90:1230-1  
© 1999 American Society of Anesthesiologists, Inc.  
Lippincott Williams & Wilkins, Inc.

## Valve System Performance

*To the Editor:*—I read the laboratory report, *Testing the Competency of the Hemostasis Valve in Introducer Catheters* published in *ANESTHESIOLOGY* 1998; 88(5):1404-6, with great concern and alarm.

Arrow® strives to manufacture our hemostasis valves to the highest

standards of performance. However, we think that it is important that practitioners not misread the results of this testing to infer that any manufacturers' valve system is infallible. Another concern is that many practitioners refer to an *introducer system* and a *hemostasis valve* in
